# Supplementary material
Source: MDPI journal article supplement (https://www.mdpi.com/2073-8994/14/11/2379)
Supplement: s1 [file s1]

## Supplementary Materials

### Reliability Inferences of the Inverted NH Parameters via Generalized Type-II Progressive Hybrid Censoring with Applications

Ahmed Elshahhat<sup>1\*</sup>, Heba S. Mohammed<sup>2</sup> and Osama E. Abo-Kasem<sup>3</sup>

<sup>1</sup>Faculty of Technology and Development, Zagazig University, Zagazig 44519, Egypt

<sup>2</sup>Department of Mathematical Sciences, College of Science, Princess Nourah bint Abdulrahman University,  
P.O. Box 84428, Riyadh 11671, Saudi Arabia

<sup>3</sup>Department of Statistics, Faculty of Commerce, Zagazig University, Egypt

---

\*Email: aelshahhat@ftd.zu.edu.eg

Table S1: The RMSEs (1st column) and MRABs (2nd column) of  $\alpha$ .

| $(T_1, T_2)$ | $n$ | $r$ | Scheme             | MLE    |        | SE-PA  |        | SE-PB  |        |
|--------------|-----|-----|--------------------|--------|--------|--------|--------|--------|--------|
| (0.2, 0.4)   | 40  | 20  | (1*20)             | 0.4453 | 0.4647 | 0.0203 | 0.0368 | 0.0076 | 0.0127 |
|              |     |     | (2*10, 0*10)       | 0.1487 | 0.2089 | 0.0043 | 0.0065 | 0.0029 | 0.0049 |
|              |     |     | (0*10, 2*10)       | 0.3711 | 0.3566 | 0.0055 | 0.0080 | 0.0023 | 0.0038 |
|              |     |     | (0*8, 4*5, 0*7)    | 0.1422 | 0.2021 | 0.0048 | 0.0077 | 0.0042 | 0.0076 |
|              |     |     | (0*5, 2*10, 0*5)   | 0.5711 | 0.3277 | 0.0053 | 0.0083 | 0.0035 | 0.0060 |
|              |     |     | (2*5, 0*10, 2*5)   | 0.1796 | 0.2350 | 0.0062 | 0.0097 | 0.0039 | 0.0062 |
|              |     | 30  | (0*19, 20)         | 0.4926 | 0.3956 | 0.0036 | 0.0063 | 0.0027 | 0.0046 |
|              |     |     | (1*10, 0*20)       | 0.1384 | 0.1941 | 0.0108 | 0.0191 | 0.0074 | 0.0119 |
|              |     |     | (0*20, 1*10)       | 0.1851 | 0.2268 | 0.0042 | 0.0069 | 0.0035 | 0.0060 |
|              |     |     | (2*5, 0*25)        | 0.1176 | 0.1963 | 0.0057 | 0.0090 | 0.0045 | 0.0069 |
|              |     |     | (0*25, 2*5)        | 0.1556 | 0.2031 | 0.0089 | 0.0172 | 0.0035 | 0.0056 |
|              |     |     | (0*13, 2*5, 0*12)  | 0.1423 | 0.1896 | 0.0043 | 0.0077 | 0.0040 | 0.0067 |
|              | 40  | 40  | (0*10, 1*10, 0*10) | 0.2709 | 0.2725 | 0.0031 | 0.0048 | 0.0026 | 0.0045 |
|              |     |     | (0*29, 10)         | 0.4875 | 0.3538 | 0.0023 | 0.0038 | 0.0023 | 0.0037 |
|              |     |     | (0*40)             | 0.2252 | 0.2592 | 0.0023 | 0.0036 | 0.0022 | 0.0036 |
|              |     | 80  | (1*40)             | 0.1474 | 0.1932 | 0.0058 | 0.0094 | 0.0051 | 0.0085 |
|              |     |     | (2*20, 0*20)       | 0.0977 | 0.1666 | 0.0043 | 0.0067 | 0.0031 | 0.0053 |
|              |     |     | (0*20, 2*20)       | 0.1336 | 0.186  | 0.0053 | 0.0085 | 0.0038 | 0.0064 |
|              |     |     | (0*16, 4*10, 0*14) | 0.0847 | 0.1421 | 0.0036 | 0.0051 | 0.0025 | 0.0044 |
|              |     |     | (0*10, 2*20, 0*10) | 0.1043 | 0.1551 | 0.0037 | 0.0058 | 0.0025 | 0.0041 |
|              |     |     | (2*10, 0*20, 2*10) | 0.0995 | 0.1528 | 0.0036 | 0.0055 | 0.0035 | 0.0061 |
|              | 60  | 60  | (0*39, 40)         | 0.1321 | 0.1745 | 0.0024 | 0.0038 | 0.0012 | 0.0019 |
|              |     |     | (1*20, 0*40)       | 0.0880 | 0.1460 | 0.0040 | 0.0069 | 0.0029 | 0.0047 |
|              |     |     | (0*40, 1*20)       | 0.0897 | 0.1353 | 0.0028 | 0.0046 | 0.0022 | 0.0037 |
|              |     |     | (2*10, 0*50)       | 0.1002 | 0.1782 | 0.0031 | 0.0052 | 0.0025 | 0.0043 |
|              |     |     | (0*50, 2*10)       | 0.0868 | 0.1285 | 0.0022 | 0.0037 | 0.0023 | 0.0037 |
|              |     |     | (0*26, 2*10, 0*24) | 0.0733 | 0.1183 | 0.0029 | 0.0048 | 0.0018 | 0.0027 |
|              |     | 80  | (0*20, 1*20, 0*20) | 0.1043 | 0.1457 | 0.0032 | 0.0052 | 0.0025 | 0.0037 |
|              |     |     | (0*59, 20)         | 0.1101 | 0.1564 | 0.0019 | 0.0032 | 0.0010 | 0.0016 |
|              |     |     | (0*80)             | 0.1059 | 0.1489 | 0.0013 | 0.0022 | 0.0012 | 0.0022 |
| (0.4, 0.8)   | 40  | 20  | (1*20)             | 0.4241 | 0.5201 | 0.0184 | 0.0302 | 0.0120 | 0.0166 |
|              |     |     | (2*10, 0*10)       | 0.1423 | 0.2475 | 0.0138 | 0.0213 | 0.0113 | 0.0184 |
|              |     |     | (0*10, 2*10)       | 0.8316 | 0.3703 | 0.0151 | 0.0251 | 0.0106 | 0.0168 |
|              |     |     | (0*8, 4*5, 0*7)    | 0.1356 | 0.2428 | 0.0134 | 0.0230 | 0.0120 | 0.0205 |
|              |     |     | (0*5, 2*10, 0*5)   | 0.1639 | 0.2094 | 0.0071 | 0.0112 | 0.0056 | 0.0096 |
|              |     |     | (2*5, 0*10, 2*5)   | 0.1445 | 0.2047 | 0.0048 | 0.0078 | 0.0041 | 0.0065 |
|              |     | 30  | (0*19, 20)         | 0.4834 | 0.3948 | 0.0032 | 0.0053 | 0.0031 | 0.0049 |
|              |     |     | (1*10, 0*20)       | 0.1119 | 0.1914 | 0.0122 | 0.0206 | 0.0091 | 0.0161 |
|              |     |     | (0*20, 1*10)       | 0.1765 | 0.2191 | 0.0120 | 0.0187 | 0.0116 | 0.0189 |
|              |     |     | (2*5, 0*25)        | 0.1303 | 0.2379 | 0.0120 | 0.0209 | 0.0088 | 0.0151 |
|              |     |     | (0*25, 2*5)        | 0.1180 | 0.1799 | 0.0075 | 0.0127 | 0.0070 | 0.0117 |
|              |     |     | (0*13, 2*5, 0*12)  | 0.1090 | 0.1854 | 0.0050 | 0.0082 | 0.0044 | 0.0070 |
|              | 40  | 40  | (0*10, 1*10, 0*10) | 0.1417 | 0.1908 | 0.0041 | 0.0044 | 0.0038 | 0.0064 |
|              |     |     | (0*29, 10)         | 0.2244 | 0.2696 | 0.0027 | 0.0040 | 0.0023 | 0.0035 |
|              |     |     | (0*40)             | 0.2077 | 0.2549 | 0.0020 | 0.0035 | 0.0017 | 0.0027 |
|              |     | 80  | (1*40)             | 0.1869 | 0.1940 | 0.0109 | 0.0199 | 0.0101 | 0.0176 |
|              |     |     | (2*20, 0*20)       | 0.1316 | 0.2458 | 0.0132 | 0.0212 | 0.0089 | 0.0145 |
|              |     |     | (0*20, 2*20)       | 0.1427 | 0.186  | 0.0111 | 0.0185 | 0.0088 | 0.0152 |
|              |     |     | (0*16, 4*10, 0*14) | 0.1351 | 0.2546 | 0.0125 | 0.0215 | 0.0103 | 0.0176 |
|              |     |     | (0*10, 2*20, 0*10) | 0.0898 | 0.1500 | 0.0044 | 0.0068 | 0.0030 | 0.0049 |
|              |     |     | (2*10, 0*20, 2*10) | 0.0893 | 0.1411 | 0.0034 | 0.0052 | 0.0033 | 0.0051 |
|              | 60  | 60  | (0*39, 40)         | 0.1365 | 0.1830 | 0.0027 | 0.0042 | 0.0025 | 0.0038 |
|              |     |     | (1*20, 0*40)       | 0.1006 | 0.1791 | 0.0084 | 0.0142 | 0.0053 | 0.0084 |
|              |     |     | (0*40, 1*20)       | 0.0862 | 0.1300 | 0.0093 | 0.0149 | 0.0055 | 0.0091 |
|              |     |     | (2*10, 0*50)       | 0.1303 | 0.2471 | 0.0096 | 0.0163 | 0.0057 | 0.0096 |
|              |     |     | (0*50, 2*10)       | 0.0825 | 0.1398 | 0.0059 | 0.0098 | 0.0052 | 0.0085 |
|              |     |     | (0*26, 2*10, 0*24) | 0.0982 | 0.1762 | 0.0049 | 0.0082 | 0.0029 | 0.0048 |
|              |     | 80  | (0*20, 1*20, 0*20) | 0.0766 | 0.1248 | 0.0033 | 0.0054 | 0.0028 | 0.0043 |
|              |     |     | (0*59, 20)         | 0.1080 | 0.1546 | 0.0023 | 0.0038 | 0.0015 | 0.0027 |
|              |     |     | (0*80)             | 0.1024 | 0.1500 | 0.0021 | 0.0037 | 0.0012 | 0.0018 |

Table S2: The RMSEs (1st column) and MRABs (2nd column) of  $\delta$ .

| $(T_1, T_2)$ | $n$        | $r$ | Scheme             | MLE    |        | SE-PA  |        | SE-PB  |        |
|--------------|------------|-----|--------------------|--------|--------|--------|--------|--------|--------|
| (0.2, 0.4)   | 40         | 20  | (1*20)             | 0.4875 | 0.5919 | 0.0094 | 0.0141 | 0.0041 | 0.0062 |
|              |            |     | (2*10, 0*10)       | 0.8158 | 1.1269 | 0.0053 | 0.0078 | 0.0041 | 0.0067 |
|              |            |     | (0*10, 2*10)       | 0.4294 | 0.5670 | 0.0122 | 0.0204 | 0.0100 | 0.0183 |
|              |            |     | (0*8, 4*5, 0*7)    | 0.8530 | 1.2556 | 0.0037 | 0.0056 | 0.0039 | 0.0059 |
|              |            |     | (0*5, 2*10, 0*5)   | 0.4014 | 0.5305 | 0.0070 | 0.0121 | 0.0024 | 0.0037 |
|              |            |     | (2*5, 0*10, 2*5)   | 1.1323 | 0.3739 | 0.0056 | 0.0082 | 0.0032 | 0.0051 |
|              |            |     | (0*19, 20)         | 0.3470 | 0.5057 | 0.0043 | 0.0079 | 0.0029 | 0.0042 |
|              |            | 30  | (1*10, 0*20)       | 0.6736 | 0.9129 | 0.0061 | 0.0096 | 0.0069 | 0.0099 |
|              |            |     | (0*20, 1*10)       | 0.4990 | 0.6581 | 0.0048 | 0.0078 | 0.0039 | 0.0067 |
|              |            |     | (2*5, 0*25)        | 1.3660 | 1.9993 | 0.0049 | 0.0083 | 0.0053 | 0.0082 |
|              |            |     | (0*25, 2*5)        | 0.4574 | 0.6099 | 0.0043 | 0.0068 | 0.0034 | 0.0056 |
|              |            |     | (0*13, 2*5, 0*12)  | 0.6014 | 0.8324 | 0.0035 | 0.0055 | 0.0041 | 0.0069 |
|              |            |     | (0*10, 1*10, 0*10) | 0.3901 | 0.4937 | 0.0039 | 0.0065 | 0.0026 | 0.0045 |
|              |            |     | (0*29, 10)         | 0.3564 | 0.5064 | 0.0052 | 0.0087 | 0.0043 | 0.0072 |
|              |            |     | (0*40)             | 0.3004 | 0.4428 | 0.0043 | 0.0073 | 0.0035 | 0.0062 |
|              | 80         | 40  | (1*40)             | 0.2625 | 0.3859 | 0.0057 | 0.0091 | 0.0053 | 0.0091 |
|              |            |     | (2*20, 0*20)       | 0.6658 | 1.0688 | 0.0039 | 0.0060 | 0.0033 | 0.0057 |
|              |            |     | (0*20, 2*20)       | 0.2700 | 0.3896 | 0.0046 | 0.0074 | 0.0042 | 0.0070 |
|              |            |     | (0*16, 4*10, 0*14) | 0.7325 | 1.2199 | 0.0030 | 0.0040 | 0.0023 | 0.0041 |
|              |            |     | (0*10, 2*20, 0*10) | 0.2750 | 0.3974 | 0.0034 | 0.0053 | 0.0026 | 0.0041 |
|              |            |     | (2*10, 0*20, 2*10) | 0.7940 | 1.1000 | 0.0042 | 0.0064 | 0.0032 | 0.0056 |
|              |            |     | (0*39, 40)         | 0.2305 | 0.3435 | 0.0041 | 0.0076 | 0.0031 | 0.0051 |
|              |            | 60  | (1*20, 0*40)       | 0.5279 | 0.8010 | 0.0039 | 0.0068 | 0.0031 | 0.0052 |
|              |            |     | (0*40, 1*20)       | 0.3708 | 0.5459 | 0.0028 | 0.0045 | 0.0022 | 0.0036 |
|              |            |     | (2*10, 0*50)       | 1.0854 | 1.8883 | 0.0031 | 0.0052 | 0.0027 | 0.0047 |
|              |            |     | (0*50, 2*10)       | 0.3531 | 0.5076 | 0.0021 | 0.0034 | 0.0022 | 0.0035 |
|              |            |     | (0*26, 2*10, 0*24) | 0.4825 | 0.7742 | 0.003  | 0.0051 | 0.0016 | 0.0024 |
|              |            |     | (0*20, 1*20, 0*20) | 0.2372 | 0.3373 | 0.0029 | 0.0047 | 0.0028 | 0.0043 |
|              |            |     | (0*59, 20)         | 0.2000 | 0.3097 | 0.0021 | 0.0039 | 0.002  | 0.0035 |
|              |            |     | (0*80)             | 0.1958 | 0.2978 | 0.0016 | 0.0025 | 0.0013 | 0.0024 |
|              | (0.4, 0.8) | 40  | (1*20)             | 0.3846 | 0.5305 | 0.0180 | 0.0297 | 0.0142 | 0.0104 |
|              |            |     | (2*10, 0*10)       | 1.6620 | 2.5883 | 0.0125 | 0.0194 | 0.0103 | 0.0167 |
|              |            |     | (0*10, 2*10)       | 0.3907 | 0.5416 | 0.0140 | 0.0232 | 0.0101 | 0.0161 |
|              |            |     | (0*8, 4*5, 0*7)    | 2.1750 | 3.5657 | 0.0140 | 0.0237 | 0.0113 | 0.0185 |
|              |            |     | (0*5, 2*10, 0*5)   | 0.6128 | 0.8790 | 0.0074 | 0.0119 | 0.0056 | 0.0098 |
|              |            |     | (2*5, 0*10, 2*5)   | 0.9932 | 1.1940 | 0.0046 | 0.0074 | 0.0040 | 0.0063 |
|              |            |     | (0*19, 20)         | 0.3554 | 0.5091 | 0.0055 | 0.0102 | 0.0051 | 0.0083 |
|              |            | 30  | (1*10, 0*20)       | 0.9864 | 1.5096 | 0.0116 | 0.0201 | 0.0091 | 0.0158 |
|              |            |     | (0*20, 1*10)       | 0.523  | 0.6758 | 0.0103 | 0.0167 | 0.0102 | 0.0152 |
|              |            |     | (2*5, 0*25)        | 2.1212 | 3.6159 | 0.0124 | 0.0211 | 0.0094 | 0.0160 |
|              |            |     | (0*25, 2*5)        | 1.0694 | 1.6171 | 0.0077 | 0.0131 | 0.0069 | 0.0114 |
|              |            |     | (0*13, 2*5, 0*12)  | 1.1385 | 1.8735 | 0.0046 | 0.0075 | 0.0043 | 0.0069 |
|              |            |     | (0*10, 1*10, 0*10) | 0.4976 | 0.7132 | 0.0045 | 0.0071 | 0.0039 | 0.0066 |
|              |            |     | (0*29, 10)         | 0.3075 | 0.4478 | 0.0053 | 0.0101 | 0.0042 | 0.0062 |
|              |            |     | (0*40)             | 0.3010 | 0.4409 | 0.0041 | 0.0069 | 0.0038 | 0.0058 |
|              |            | 80  | (1*40)             | 0.2534 | 0.3770 | 0.0109 | 0.0199 | 0.0094 | 0.0163 |
|              |            |     | (2*20, 0*20)       | 1.4432 | 2.5521 | 0.0128 | 0.0206 | 0.0089 | 0.0141 |
|              |            |     | (0*20, 2*20)       | 0.2570 | 0.3805 | 0.0116 | 0.0195 | 0.0089 | 0.0153 |
|              |            |     | (0*16, 4*10, 0*14) | 2.0157 | 3.6211 | 0.0115 | 0.0201 | 0.0107 | 0.0184 |
|              |            |     | (0*10, 2*20, 0*10) | 0.526  | 0.8343 | 0.0045 | 0.0070 | 0.0032 | 0.0053 |
|              |            |     | (2*10, 0*20, 2*10) | 0.6558 | 0.9457 | 0.0038 | 0.0058 | 0.0035 | 0.0056 |
|              |            |     | (0*39, 40)         | 0.2194 | 0.3409 | 0.0032 | 0.0056 | 0.0030 | 0.0054 |
|              |            | 60  | (1*20, 0*40)       | 0.8433 | 1.4497 | 0.0090 | 0.0156 | 0.0058 | 0.0093 |
|              |            |     | (0*40, 1*20)       | 0.3708 | 0.5407 | 0.0096 | 0.0155 | 0.0057 | 0.0097 |
|              |            |     | (2*10, 0*50)       | 1.9409 | 3.5744 | 0.0084 | 0.0137 | 0.0054 | 0.0088 |
|              |            |     | (0*50, 2*10)       | 0.9917 | 1.6490 | 0.0057 | 0.0092 | 0.0050 | 0.0080 |
|              |            |     | (0*26, 2*10, 0*24) | 1.0475 | 1.8926 | 0.0049 | 0.0081 | 0.0030 | 0.0050 |
|              |            |     | (0*20, 1*20, 0*20) | 0.3839 | 0.5961 | 0.0033 | 0.0055 | 0.0030 | 0.0047 |
|              |            |     | (0*59, 20)         | 0.2025 | 0.3135 | 0.0016 | 0.0025 | 0.0014 | 0.0024 |
|              |            |     | (0*80)             | 0.1981 | 0.2988 | 0.0011 | 0.0018 | 0.0011 | 0.0017 |

Table S3: The RMSEs (1st column) and MRABs (2nd column) of  $R(t)$ .

| $(T_1, T_2)$ | $n$ | $r$ | Scheme             | MLE    |        | SE-PA  |        | SE-PB  |        |
|--------------|-----|-----|--------------------|--------|--------|--------|--------|--------|--------|
| (0.2, 0.4)   | 40  | 20  | (1*20)             | 0.0611 | 0.0626 | 0.0231 | 0.0278 | 0.0078 | 0.0088 |
|              |     |     | (2*10, 0*10)       | 0.0684 | 0.0778 | 0.0047 | 0.0051 | 0.0031 | 0.0033 |
|              |     |     | (0*10, 2*10)       | 0.0675 | 0.0729 | 0.0098 | 0.0109 | 0.0057 | 0.0064 |
|              |     |     | (0*8, 4*5, 0*7)    | 0.0986 | 0.1207 | 0.0051 | 0.0055 | 0.0048 | 0.0055 |
|              |     |     | (0*5, 2*10, 0*5)   | 0.0576 | 0.0609 | 0.0081 | 0.0093 | 0.0038 | 0.0041 |
|              |     |     | (2*5, 0*10, 2*5)   | 0.0885 | 0.1029 | 0.0045 | 0.0045 | 0.0045 | 0.0048 |
|              |     | 30  | (0*19, 20)         | 0.0592 | 0.0613 | 0.0037 | 0.0038 | 0.0024 | 0.0026 |
|              |     |     | (1*10, 0*20)       | 0.0663 | 0.0739 | 0.0126 | 0.0143 | 0.0067 | 0.0074 |
|              |     |     | (0*20, 1*10)       | 0.0706 | 0.0790 | 0.0044 | 0.0044 | 0.0047 | 0.0054 |
|              |     |     | (2*5, 0*25)        | 0.1068 | 0.1335 | 0.0073 | 0.0073 | 0.0040 | 0.0039 |
|              |     |     | (0*25, 2*5)        | 0.0698 | 0.0748 | 0.0077 | 0.0094 | 0.0041 | 0.0042 |
|              |     |     | (0*13, 2*5, 0*12)  | 0.0892 | 0.1065 | 0.0026 | 0.0039 | 0.0031 | 0.0031 |
|              | 40  | 40  | (0*10, 1*10, 0*10) | 0.0563 | 0.0591 | 0.0029 | 0.0029 | 0.0027 | 0.0030 |
|              |     |     | (0*29, 10)         | 0.0650 | 0.0676 | 0.0027 | 0.0028 | 0.0025 | 0.0028 |
|              |     |     | (0*40)             | 0.0557 | 0.0575 | 0.0026 | 0.0027 | 0.0022 | 0.0023 |
|              |     | 80  | (1*40)             | 0.0425 | 0.0439 | 0.0076 | 0.0083 | 0.0043 | 0.0044 |
|              |     |     | (2*20, 0*20)       | 0.0635 | 0.0764 | 0.0049 | 0.0055 | 0.0040 | 0.0044 |
|              |     |     | (0*20, 2*20)       | 0.0527 | 0.0575 | 0.0043 | 0.0041 | 0.0029 | 0.0031 |
|              |     |     | (0*16, 4*10, 0*14) | 0.0950 | 0.1204 | 0.0039 | 0.0040 | 0.0035 | 0.0043 |
|              |     |     | (0*10, 2*20, 0*10) | 0.0430 | 0.0454 | 0.0050 | 0.0050 | 0.0023 | 0.0024 |
|              |     |     | (2*10, 0*20, 2*10) | 0.0821 | 0.0991 | 0.0034 | 0.0032 | 0.0027 | 0.0029 |
|              | 60  | 60  | (0*39, 40)         | 0.0397 | 0.0409 | 0.0022 | 0.0023 | 0.0020 | 0.0020 |
|              |     |     | (1*20, 0*40)       | 0.0584 | 0.0685 | 0.0057 | 0.0068 | 0.0038 | 0.0041 |
|              |     |     | (0*40, 1*20)       | 0.0646 | 0.0754 | 0.0032 | 0.0034 | 0.0021 | 0.0023 |
|              |     |     | (2*10, 0*50)       | 0.1030 | 0.1318 | 0.0031 | 0.0035 | 0.0024 | 0.0026 |
|              |     |     | (0*50, 2*10)       | 0.0625 | 0.0644 | 0.0021 | 0.0022 | 0.0019 | 0.0020 |
|              |     |     | (0*26, 2*10, 0*24) | 0.0821 | 0.1025 | 0.0034 | 0.0038 | 0.0022 | 0.0021 |
|              |     | 80  | (0*20, 1*20, 0*20) | 0.0436 | 0.0463 | 0.0031 | 0.0033 | 0.0027 | 0.0029 |
|              |     |     | (0*59, 20)         | 0.0389 | 0.0406 | 0.0017 | 0.0019 | 0.0014 | 0.0017 |
|              |     |     | (0*80)             | 0.0382 | 0.0397 | 0.0013 | 0.0013 | 0.0012 | 0.0012 |
| (0.4, 0.8)   | 40  | 20  | (1*20)             | 0.0639 | 0.0670 | 0.0276 | 0.0299 | 0.0159 | 0.0169 |
|              |     |     | (2*10, 0*10)       | 0.0910 | 0.0110 | 0.0195 | 0.0199 | 0.0138 | 0.0157 |
|              |     |     | (0*10, 2*10)       | 0.0662 | 0.0713 | 0.0199 | 0.0219 | 0.0127 | 0.0136 |
|              |     |     | (0*8, 4*5, 0*7)    | 0.1222 | 0.1554 | 0.0185 | 0.0222 | 0.0158 | 0.0190 |
|              |     |     | (0*5, 2*10, 0*5)   | 0.0691 | 0.0774 | 0.0081 | 0.0088 | 0.0051 | 0.0055 |
|              |     |     | (2*5, 0*10, 2*5)   | 0.0892 | 0.1039 | 0.0056 | 0.0055 | 0.0045 | 0.0048 |
|              |     | 30  | (0*19, 20)         | 0.0595 | 0.0613 | 0.0049 | 0.0054 | 0.0042 | 0.0040 |
|              |     |     | (1*10, 0*20)       | 0.0832 | 0.0984 | 0.0173 | 0.0196 | 0.0135 | 0.0158 |
|              |     |     | (0*20, 1*10)       | 0.0753 | 0.0848 | 0.0115 | 0.0119 | 0.0109 | 0.0116 |
|              |     |     | (2*5, 0*25)        | 0.1267 | 0.1618 | 0.0172 | 0.0201 | 0.0101 | 0.0115 |
|              |     |     | (0*25, 2*5)        | 0.1155 | 0.1434 | 0.0101 | 0.0110 | 0.0095 | 0.0109 |
|              |     |     | (0*13, 2*5, 0*12)  | 0.1087 | 0.1363 | 0.0048 | 0.0052 | 0.0043 | 0.0045 |
|              | 40  | 40  | (0*10, 1*10, 0*10) | 0.0679 | 0.0752 | 0.0040 | 0.0042 | 0.0032 | 0.0034 |
|              |     |     | (0*29, 10)         | 0.0556 | 0.0572 | 0.0036 | 0.0036 | 0.0032 | 0.0036 |
|              |     |     | (0*40)             | 0.0555 | 0.0575 | 0.0033 | 0.0037 | 0.0029 | 0.0032 |
|              |     | 80  | (1*40)             | 0.0433 | 0.0452 | 0.0162 | 0.0194 | 0.0136 | 0.0165 |
|              |     |     | (2*20, 0*20)       | 0.0896 | 0.1132 | 0.0172 | 0.0190 | 0.0109 | 0.0122 |
|              |     |     | (0*20, 2*20)       | 0.0533 | 0.0585 | 0.0148 | 0.0179 | 0.0099 | 0.0105 |
|              |     |     | (0*16, 4*10, 0*14) | 0.1192 | 0.1539 | 0.0166 | 0.0203 | 0.0139 | 0.0170 |
|              |     |     | (0*10, 2*20, 0*10) | 0.0595 | 0.0690 | 0.0038 | 0.0039 | 0.0033 | 0.0037 |
|              |     |     | (2*10, 0*20, 2*10) | 0.0820 | 0.0989 | 0.0043 | 0.0044 | 0.0044 | 0.0045 |
|              | 60  | 60  | (0*39, 40)         | 0.0418 | 0.0434 | 0.0034 | 0.0036 | 0.0024 | 0.0027 |
|              |     |     | (1*20, 0*40)       | 0.0778 | 0.0963 | 0.0120 | 0.0139 | 0.0075 | 0.0082 |
|              |     |     | (0*40, 1*20)       | 0.0657 | 0.0763 | 0.0130 | 0.0141 | 0.0070 | 0.0075 |
|              |     |     | (2*10, 0*50)       | 0.1249 | 0.1614 | 0.0106 | 0.0123 | 0.0049 | 0.0051 |
|              |     |     | (0*50, 2*10)       | 0.1155 | 0.1476 | 0.0067 | 0.0074 | 0.0060 | 0.0066 |
|              |     |     | (0*26, 2*10, 0*24) | 0.1061 | 0.1357 | 0.0038 | 0.0040 | 0.0026 | 0.0029 |
|              |     | 80  | (0*20, 1*20, 0*20) | 0.0580 | 0.0671 | 0.0039 | 0.0044 | 0.0037 | 0.0039 |
|              |     |     | (0*59, 20)         | 0.0389 | 0.0406 | 0.0029 | 0.0030 | 0.0023 | 0.0023 |
|              |     |     | (0*80)             | 0.0385 | 0.0398 | 0.0026 | 0.0030 | 0.0017 | 0.0019 |

Table S4: The RMSEs (1st column) and MRABs (2nd column) of  $h(t)$ .

| $(T_1, T_2)$ | $n$        | $r$ | Scheme             | MLE    |        | SE-PA  |        | SE-PB  |        |
|--------------|------------|-----|--------------------|--------|--------|--------|--------|--------|--------|
| (0.2, 0.4)   | 40         | 20  | (1*20)             | 0.9935 | 0.2406 | 0.1562 | 0.0457 | 0.0470 | 0.0130 |
|              |            |     | (2*10, 0*10)       | 0.9191 | 0.2655 | 0.0331 | 0.0089 | 0.0221 | 0.0056 |
|              |            |     | (0*10, 2*10)       | 0.9037 | 0.2266 | 0.0790 | 0.0216 | 0.0515 | 0.0146 |
|              |            |     | (0*8, 4*5, 0*7)    | 1.1685 | 0.3501 | 0.0318 | 0.0083 | 0.0318 | 0.0089 |
|              |            |     | (0*5, 2*10, 0*5)   | 0.7785 | 0.1929 | 0.0590 | 0.0169 | 0.0241 | 0.0065 |
|              |            |     | (2*5, 0*10, 2*5)   | 1.1129 | 0.3138 | 0.0232 | 0.0054 | 0.0313 | 0.0082 |
|              |            | 30  | (0*19, 20)         | 0.9165 | 0.2209 | 0.0256 | 0.0063 | 0.0150 | 0.0040 |
|              |            |     | (1*10, 0*20)       | 0.8516 | 0.2390 | 0.0846 | 0.0229 | 0.0399 | 0.0112 |
|              |            |     | (0*20, 1*10)       | 0.7989 | 0.2209 | 0.0290 | 0.0074 | 0.0336 | 0.0094 |
|              |            |     | (2*5, 0*25)        | 1.3726 | 0.4242 | 0.0492 | 0.0120 | 0.0263 | 0.0066 |
|              |            |     | (0*25, 2*5)        | 0.7656 | 0.2020 | 0.0414 | 0.0121 | 0.0274 | 0.0070 |
|              |            |     | (0*13, 2*5, 0*12)  | 0.9826 | 0.2871 | 0.0203 | 0.0051 | 0.0173 | 0.0044 |
|              | 40         | 40  | (0*10, 1*10, 0*10) | 0.6832 | 0.1726 | 0.0192 | 0.0050 | 0.0178 | 0.0047 |
|              |            |     | (0*29, 10)         | 0.9021 | 0.2200 | 0.0217 | 0.0059 | 0.0173 | 0.0047 |
|              |            |     | (0*40)             | 0.7721 | 0.1904 | 0.0202 | 0.0052 | 0.0200 | 0.0048 |
|              |            | 80  | (1*40)             | 0.6711 | 0.1643 | 0.0522 | 0.0140 | 0.0265 | 0.0071 |
|              |            |     | (2*20, 0*20)       | 0.9095 | 0.2741 | 0.0325 | 0.0090 | 0.0277 | 0.0074 |
|              |            |     | (0*20, 2*20)       | 0.6165 | 0.1601 | 0.0249 | 0.0062 | 0.0170 | 0.0047 |
|              |            |     | (0*16, 4*10, 0*14) | 1.1687 | 0.3618 | 0.0259 | 0.0067 | 0.0245 | 0.0074 |
|              |            |     | (0*10, 2*20, 0*10) | 0.5163 | 0.1337 | 0.0356 | 0.0086 | 0.0147 | 0.0037 |
|              |            |     | (2*10, 0*20, 2*10) | 1.0299 | 0.2984 | 0.0223 | 0.0054 | 0.0150 | 0.0038 |
|              | 60         | 60  | (0*39, 40)         | 0.5907 | 0.1445 | 0.0169 | 0.0046 | 0.0167 | 0.0044 |
|              |            |     | (1*20, 0*40)       | 0.7893 | 0.2313 | 0.0402 | 0.0117 | 0.0267 | 0.0072 |
|              |            |     | (0*40, 1*20)       | 0.7314 | 0.2057 | 0.0216 | 0.0056 | 0.0131 | 0.0034 |
|              |            |     | (2*10, 0*50)       | 1.3618 | 0.4289 | 0.0198 | 0.0054 | 0.0152 | 0.0040 |
|              |            |     | (0*50, 2*10)       | 0.7092 | 0.1801 | 0.0132 | 0.0033 | 0.0114 | 0.0028 |
|              |            |     | (0*26, 2*10, 0*24) | 0.9497 | 0.2908 | 0.0233 | 0.0064 | 0.0152 | 0.0036 |
|              |            | 80  | (0*20, 1*20, 0*20) | 0.4848 | 0.1262 | 0.0199 | 0.0053 | 0.0181 | 0.0050 |
|              |            |     | (0*59, 20)         | 0.5278 | 0.1309 | 0.0110 | 0.003  | 0.0114 | 0.0032 |
|              |            |     | (0*80)             | 0.5141 | 0.1261 | 0.0087 | 0.0025 | 0.0083 | 0.0022 |
|              | (0.4, 0.8) | 40  | (1*20)             | 1.0064 | 0.2406 | 0.1864 | 0.0497 | 0.1103 | 0.0296 |
|              |            |     | (2*10, 0*10)       | 1.3410 | 0.4107 | 0.1307 | 0.0329 | 0.0912 | 0.0264 |
|              |            |     | (0*10, 2*10)       | 0.8507 | 0.2148 | 0.1326 | 0.0361 | 0.0837 | 0.0219 |
|              |            |     | (0*8, 4*5, 0*7)    | 1.6611 | 0.5203 | 0.1351 | 0.0400 | 0.1332 | 0.0335 |
|              |            |     | (0*5, 2*10, 0*5)   | 0.8747 | 0.2456 | 0.0543 | 0.0150 | 0.0319 | 0.0081 |
|              |            |     | (2*5, 0*10, 2*5)   | 1.0782 | 0.3022 | 0.0375 | 0.0088 | 0.0305 | 0.0082 |
|              |            |     | (0*19, 20)         | 0.9265 | 0.2230 | 0.0363 | 0.0098 | 0.0309 | 0.0068 |
|              |            | 30  | (1*10, 0*20)       | 1.1261 | 0.3363 | 0.1267 | 0.0350 | 0.0939 | 0.0269 |
|              |            |     | (0*20, 1*10)       | 0.8506 | 0.2310 | 0.0685 | 0.0185 | 0.0680 | 0.0180 |
|              |            |     | (2*5, 0*25)        | 1.7148 | 0.5409 | 0.1260 | 0.0360 | 0.0706 | 0.0200 |
|              |            |     | (0*25, 2*5)        | 1.3807 | 0.4170 | 0.0697 | 0.0186 | 0.0681 | 0.0193 |
|              |            |     | (0*13, 2*5, 0*12)  | 1.3874 | 0.4313 | 0.0305 | 0.0081 | 0.0280 | 0.0072 |
|              |            |     | (0*10, 1*10, 0*10) | 0.8049 | 0.2234 | 0.0259 | 0.0070 | 0.0192 | 0.0050 |
|              |            | 40  | (0*29, 10)         | 0.7791 | 0.1911 | 0.0298 | 0.0080 | 0.0260 | 0.0068 |
|              |            |     | (0*40)             | 0.7535 | 0.1854 | 0.0280 | 0.0081 | 0.0233 | 0.0063 |
|              |            | 80  | (1*40)             | 0.6445 | 0.1602 | 0.1123 | 0.0328 | 0.0978 | 0.0291 |
|              |            |     | (2*20, 0*20)       | 1.3678 | 0.4293 | 0.1239 | 0.0339 | 0.0735 | 0.0203 |
|              |            |     | (0*20, 2*20)       | 0.6101 | 0.1595 | 0.1067 | 0.0321 | 0.0681 | 0.0180 |
|              |            |     | (0*16, 4*10, 0*14) | 1.6717 | 0.5297 | 0.1195 | 0.0361 | 0.1009 | 0.0305 |
|              |            |     | (0*10, 2*20, 0*10) | 0.8138 | 0.2372 | 0.0242 | 0.0062 | 0.0226 | 0.0061 |
|              |            |     | (2*10, 0*20, 2*10) | 0.9922 | 0.2883 | 0.0302 | 0.0077 | 0.0308 | 0.0079 |
|              |            | 60  | (0*39, 40)         | 0.6171 | 0.1502 | 0.0252 | 0.0066 | 0.0191 | 0.0054 |
|              |            |     | (1*20, 0*40)       | 1.1078 | 0.3424 | 0.0878 | 0.0250 | 0.0545 | 0.0147 |
|              |            |     | (0*40, 1*20)       | 0.7408 | 0.2064 | 0.0951 | 0.0252 | 0.0494 | 0.0130 |
|              |            |     | (2*10, 0*50)       | 1.7159 | 0.5451 | 0.0719 | 0.0206 | 0.0290 | 0.0077 |
|              |            |     | (0*50, 2*10)       | 1.4087 | 0.4389 | 0.0458 | 0.0126 | 0.0402 | 0.0108 |
|              |            |     | (0*26, 2*10, 0*24) | 1.3921 | 0.4391 | 0.0220 | 0.0059 | 0.0163 | 0.0041 |
|              |            | 80  | (0*20, 1*20, 0*20) | 0.7140 | 0.2055 | 0.0265 | 0.0075 | 0.0263 | 0.0068 |
|              |            |     | (0*59, 20)         | 0.5208 | 0.1312 | 0.0173 | 0.0046 | 0.0135 | 0.0032 |
|              |            |     | (0*80)             | 0.5017 | 0.1253 | 0.0169 | 0.0047 | 0.0114 | 0.0029 |

Table S5: The ACLs of 95% ACI/HPD intervals of  $\alpha$ .

| $n$                      | $r$ | Scheme             | ACI        | HPD-PA | HPD-PB | ACI        | HPD-PA | HPD-PB |
|--------------------------|-----|--------------------|------------|--------|--------|------------|--------|--------|
| $(T_1, T_2) \rightarrow$ |     |                    | (0.2, 0.4) |        |        | (0.4, 0.8) |        |        |
| 40                       | 20  | (1*20)             | 0.0365     | 0.0282 | 0.0239 | 0.0352     | 0.0319 | 0.0221 |
|                          |     | (2*10, 0*10)       | 0.0133     | 0.0119 | 0.0086 | 0.0305     | 0.0231 | 0.0065 |
|                          |     | (0*10, 2*10)       | 0.0297     | 0.0164 | 0.0082 | 0.0301     | 0.0282 | 0.0221 |
|                          |     | (0*8, 4*5, 0*7)    | 0.0105     | 0.0104 | 0.0094 | 0.0208     | 0.0196 | 0.0040 |
|                          |     | (0*5, 2*10, 0*5)   | 0.0279     | 0.0125 | 0.0110 | 0.0173     | 0.0166 | 0.0146 |
|                          | 30  | (2*5, 0*10, 2*5)   | 0.0158     | 0.0157 | 0.0100 | 0.0164     | 0.0135 | 0.0125 |
|                          |     | (0*19, 20)         | 0.8181     | 0.0118 | 0.0077 | 0.8141     | 0.0118 | 0.0099 |
|                          |     | (1*10, 0*20)       | 0.0212     | 0.0149 | 0.0137 | 0.0210     | 0.0165 | 0.0084 |
|                          |     | (0*20, 1*10)       | 0.0189     | 0.0116 | 0.0084 | 0.0274     | 0.0268 | 0.0185 |
|                          |     | (2*5, 0*25)        | 0.0156     | 0.0109 | 0.0071 | 0.0193     | 0.0189 | 0.0038 |
|                          |     | (0*25, 2*5)        | 0.0224     | 0.0134 | 0.0084 | 0.0183     | 0.0154 | 0.0086 |
|                          |     | (0*13, 2*5, 0*12)  | 0.0132     | 0.0101 | 0.0097 | 0.0156     | 0.0131 | 0.0065 |
|                          |     | (0*10, 1*10, 0*10) | 0.0266     | 0.0109 | 0.0076 | 0.0155     | 0.0130 | 0.0107 |
|                          |     | (0*29, 10)         | 0.8127     | 0.0084 | 0.0071 | 0.6409     | 0.0093 | 0.0087 |
|                          |     | (0*40)             | 0.6235     | 0.0082 | 0.0070 | 0.6193     | 0.0074 | 0.0066 |
| 80                       | 40  | (1*40)             | 0.0158     | 0.0145 | 0.0119 | 0.0192     | 0.0167 | 0.0151 |
|                          |     | (2*20, 0*20)       | 0.0093     | 0.0085 | 0.0058 | 0.0231     | 0.0189 | 0.0030 |
|                          |     | (0*20, 2*20)       | 0.0122     | 0.0118 | 0.0092 | 0.0204     | 0.0197 | 0.0122 |
|                          |     | (0*16, 4*10, 0*14) | 0.0046     | 0.0039 | 0.0070 | 0.0190     | 0.0174 | 0.0019 |
|                          |     | (0*10, 2*20, 0*10) | 0.0109     | 0.0081 | 0.0072 | 0.0127     | 0.0093 | 0.0063 |
|                          |     | (2*10, 0*20, 2*10) | 0.0089     | 0.0081 | 0.0067 | 0.0068     | 0.0107 | 0.0104 |
|                          | 60  | (0*39, 40)         | 0.4153     | 0.0056 | 0.0045 | 0.4243     | 0.0092 | 0.0068 |
|                          |     | (1*20, 0*40)       | 0.0071     | 0.0069 | 0.0067 | 0.0161     | 0.0125 | 0.0046 |
|                          |     | (0*40, 1*20)       | 0.0087     | 0.0085 | 0.0065 | 0.0158     | 0.0190 | 0.0085 |
|                          |     | (2*10, 0*50)       | 0.0090     | 0.0063 | 0.0037 | 0.0189     | 0.0149 | 0.0021 |
|                          |     | (0*50, 2*10)       | 0.0120     | 0.0059 | 0.0053 | 0.0160     | 0.0150 | 0.0041 |
|                          |     | (0*26, 2*10, 0*24) | 0.0070     | 0.0061 | 0.0056 | 0.0124     | 0.0083 | 0.0035 |
|                          |     | (0*20, 1*20, 0*20) | 0.0112     | 0.0083 | 0.0070 | 0.0100     | 0.0087 | 0.0075 |
|                          |     | (0*59, 20)         | 0.3730     | 0.0055 | 0.0033 | 0.3698     | 0.0069 | 0.0044 |
|                          |     | (0*80)             | 0.3641     | 0.0042 | 0.0030 | 0.3631     | 0.0033 | 0.0030 |

Table S6: The ACLs of 95% ACI/HPD intervals of  $\delta$ .

| $n$                      | $r$ | Scheme             | ACI        | HPD-PA | HPD-PB | ACI        | HPD-PA | HPD-PB |
|--------------------------|-----|--------------------|------------|--------|--------|------------|--------|--------|
| $(T_1, T_2) \rightarrow$ |     |                    | (0.2, 0.4) |        |        | (0.4, 0.8) |        |        |
| 40                       | 20  | (1*20)             | 0.0291     | 0.0234 | 0.0159 | 0.0306     | 0.0304 | 0.0250 |
|                          |     | (2*10, 0*10)       | 0.0372     | 0.0169 | 0.0109 | 0.0458     | 0.0271 | 0.0216 |
|                          |     | (0*10, 2*10)       | 0.0266     | 0.0209 | 0.0155 | 0.0280     | 0.0253 | 0.0199 |
|                          |     | (0*8, 4*5, 0*7)    | 0.0335     | 0.0126 | 0.0116 | 0.0432     | 0.0223 | 0.0120 |
|                          |     | (0*5, 2*10, 0*5)   | 0.0289     | 0.0117 | 0.0084 | 0.0350     | 0.0169 | 0.0165 |
|                          | 30  | (2*5, 0*10, 2*5)   | 0.0348     | 0.0170 | 0.0086 | 0.0355     | 0.0156 | 0.0124 |
|                          |     | (0*19, 20)         | 1.0118     | 0.1171 | 0.0135 | 1.0305     | 0.0123 | 0.0114 |
|                          |     | (1*10, 0*20)       | 0.0346     | 0.0201 | 0.0157 | 0.0402     | 0.0201 | 0.0167 |
|                          |     | (0*20, 1*10)       | 0.0301     | 0.0151 | 0.0096 | 0.0311     | 0.0239 | 0.0230 |
|                          |     | (2*5, 0*25)        | 0.0388     | 0.0162 | 0.0128 | 0.0463     | 0.0203 | 0.0191 |
|                          |     | (0*25, 2*5)        | 0.0314     | 0.0112 | 0.0079 | 0.0359     | 0.0195 | 0.0156 |
|                          |     | (0*13, 2*5, 0*12)  | 0.0314     | 0.0103 | 0.0085 | 0.0387     | 0.0145 | 0.0127 |
|                          |     | (0*10, 1*10, 0*10) | 0.0281     | 0.0129 | 0.0081 | 0.0336     | 0.0139 | 0.0110 |
|                          |     | (0*29, 10)         | 1.0308     | 0.0132 | 0.0114 | 1.0184     | 0.0110 | 0.0077 |
|                          |     | (0*40)             | 1.0146     | 0.0100 | 0.0067 | 1.0121     | 0.0097 | 0.0059 |
| 80                       | 40  | (1*40)             | 0.0201     | 0.0146 | 0.0127 | 0.0210     | 0.0183 | 0.0158 |
|                          |     | (2*20, 0*20)       | 0.0266     | 0.0093 | 0.0082 | 0.0325     | 0.0225 | 0.0198 |
|                          |     | (0*20, 2*20)       | 0.0189     | 0.0106 | 0.0101 | 0.0193     | 0.0212 | 0.0196 |
|                          |     | (0*16, 4*10, 0*14) | 0.0239     | 0.0062 | 0.0039 | 0.0305     | 0.0180 | 0.0169 |
|                          |     | (0*10, 2*20, 0*10) | 0.0206     | 0.0075 | 0.0070 | 0.0247     | 0.0128 | 0.0089 |
|                          |     | (2*10, 0*20, 2*10) | 0.0242     | 0.0100 | 0.0077 | 0.0244     | 0.0107 | 0.0106 |
|                          | 60  | (0*39, 40)         | 0.8588     | 0.0063 | 0.0053 | 0.8372     | 0.0068 | 0.0067 |
|                          |     | (1*20, 0*40)       | 0.0240     | 0.0069 | 0.0065 | 0.0278     | 0.0159 | 0.0133 |
|                          |     | (0*40, 1*20)       | 0.0210     | 0.0082 | 0.0060 | 0.0214     | 0.0199 | 0.0161 |
|                          |     | (2*10, 0*50)       | 0.0270     | 0.0083 | 0.0065 | 0.0320     | 0.0192 | 0.0139 |
|                          |     | (0*50, 2*10)       | 0.0219     | 0.0059 | 0.0060 | 0.0248     | 0.0156 | 0.0150 |
|                          |     | (0*26, 2*10, 0*24) | 0.0222     | 0.0070 | 0.0070 | 0.0272     | 0.0124 | 0.0078 |
|                          |     | (0*20, 1*20, 0*20) | 0.0200     | 0.0080 | 0.0073 | 0.0233     | 0.0098 | 0.0093 |
|                          |     | (0*59, 20)         | 0.7491     | 0.0037 | 0.0029 | 0.7657     | 0.0056 | 0.0048 |
|                          |     | (0*80)             | 0.7403     | 0.0033 | 0.0019 | 0.7419     | 0.0041 | 0.0033 |

Table S7: The ACLs of 95% ACI/HPD intervals of  $R(t)$ .

| $n$                      | $r$ | Scheme             | ACI        | HPD-PA | HPD-PB | ACI        | HPD-PA | HPD-PB |
|--------------------------|-----|--------------------|------------|--------|--------|------------|--------|--------|
| $(T_1, T_2) \rightarrow$ |     |                    | (0.2, 0.4) |        |        | (0.4, 0.8) |        |        |
| 40                       | 20  | (1*20)             | 0.0981     | 0.0297 | 0.0246 | 0.1010     | 0.0452 | 0.0287 |
|                          |     | (2*10, 0*10)       | 0.0603     | 0.0145 | 0.0109 | 0.0422     | 0.0391 | 0.0247 |
|                          |     | (0*10, 2*10)       | 0.0788     | 0.0208 | 0.0121 | 0.0785     | 0.0350 | 0.0254 |
|                          |     | (0*8, 4*5, 0*7)    | 0.0447     | 0.0106 | 0.0089 | 0.0276     | 0.0225 | 0.0212 |
|                          |     | (0*5, 2*10, 0*5)   | 0.0806     | 0.0151 | 0.0129 | 0.0620     | 0.0199 | 0.0169 |
|                          |     | (2*5, 0*10, 2*5)   | 0.0560     | 0.0125 | 0.0111 | 0.0551     | 0.0213 | 0.0141 |
|                          |     | (0*19, 20)         | 0.2823     | 0.0139 | 0.0074 | 0.2148     | 0.0147 | 0.0134 |
|                          |     | (1*10, 0*20)       | 0.0622     | 0.0242 | 0.0120 | 0.0489     | 0.0269 | 0.0227 |
|                          |     | (0*20, 1*10)       | 0.0647     | 0.0146 | 0.0091 | 0.0640     | 0.0324 | 0.0276 |
|                          |     | (2*5, 0*25)        | 0.0389     | 0.0197 | 0.0112 | 0.0273     | 0.0255 | 0.0189 |
|                          | 30  | (0*25, 2*5)        | 0.0664     | 0.0108 | 0.0084 | 0.0374     | 0.0240 | 0.0193 |
|                          |     | (0*13, 2*5, 0*12)  | 0.0515     | 0.0100 | 0.0088 | 0.0362     | 0.0155 | 0.0146 |
|                          |     | (0*10, 1*10, 0*10) | 0.0794     | 0.0104 | 0.0086 | 0.0632     | 0.0135 | 0.0105 |
|                          |     | (0*29, 10)         | 0.2386     | 0.0099 | 0.0076 | 0.2079     | 0.0107 | 0.0101 |
|                          |     | (0*40)             | 0.2068     | 0.0089 | 0.0075 | 0.2064     | 0.0102 | 0.0073 |
| 80                       | 40  | (1*40)             | 0.0631     | 0.0169 | 0.0130 | 0.0631     | 0.0241 | 0.0181 |
|                          |     | (2*20, 0*20)       | 0.0393     | 0.0093 | 0.0091 | 0.0273     | 0.0275 | 0.0202 |
|                          |     | (0*20, 2*20)       | 0.0501     | 0.0111 | 0.0084 | 0.0497     | 0.0217 | 0.0197 |
|                          |     | (0*16, 4*10, 0*14) | 0.0289     | 0.0074 | 0.0041 | 0.0182     | 0.0205 | 0.0169 |
|                          |     | (0*10, 2*20, 0*10) | 0.0518     | 0.0108 | 0.0069 | 0.0397     | 0.0106 | 0.0097 |
|                          |     | (2*10, 0*20, 2*10) | 0.0363     | 0.0089 | 0.0067 | 0.0368     | 0.0145 | 0.0132 |
|                          |     | (0*39, 40)         | 0.1522     | 0.0079 | 0.0055 | 0.1523     | 0.0092 | 0.0071 |
|                          | 60  | (1*20, 0*40)       | 0.0414     | 0.0089 | 0.0085 | 0.0328     | 0.0196 | 0.0156 |
|                          |     | (0*40, 1*20)       | 0.0421     | 0.0084 | 0.0061 | 0.0415     | 0.0259 | 0.0180 |
|                          |     | (2*10, 0*50)       | 0.0262     | 0.0073 | 0.0066 | 0.0185     | 0.0176 | 0.0151 |
|                          |     | (0*50, 2*10)       | 0.0454     | 0.0057 | 0.0053 | 0.0238     | 0.0188 | 0.0160 |
|                          |     | (0*26, 2*10, 0*24) | 0.0339     | 0.0079 | 0.0071 | 0.0243     | 0.0103 | 0.0079 |
|                          |     | (0*20, 1*20, 0*20) | 0.0512     | 0.0071 | 0.0060 | 0.0419     | 0.0121 | 0.0116 |
|                          |     | (0*59, 20)         | 0.1475     | 0.0050 | 0.0043 | 0.1474     | 0.0084 | 0.0068 |
|                          |     | (0*80)             | 0.1474     | 0.0043 | 0.0038 | 0.1467     | 0.0045 | 0.0039 |
|                          | 80  |                    |            |        |        |            |        |        |
|                          |     |                    |            |        |        |            |        |        |



Table S8: The ACLs of 95% ACI/HPD intervals of  $h(t)$ .

| $n$                      | $r$ | Scheme             | ACI        | HPD-PA | HPD-PB | ACI        | HPD-PA | HPD-PB |
|--------------------------|-----|--------------------|------------|--------|--------|------------|--------|--------|
| $(T_1, T_2) \rightarrow$ |     |                    | (0.2, 0.4) |        |        | (0.4, 0.8) |        |        |
| 40                       | 20  | (1*20)             | 0.7164     | 0.2063 | 0.1467 | 0.7470     | 0.2981 | 0.1955 |
|                          |     | (2*10, 0*10)       | 0.7519     | 0.1083 | 0.0763 | 0.7593     | 0.2547 | 0.1612 |
|                          |     | (0*10, 2*10)       | 0.5919     | 0.1549 | 0.0975 | 0.6238     | 0.2314 | 0.1683 |
|                          |     | (0*8, 4*5, 0*7)    | 0.5708     | 0.0715 | 0.0588 | 0.5885     | 0.1879 | 0.1554 |
|                          |     | (0*5, 2*10, 0*5)   | 0.6771     | 0.0976 | 0.0847 | 0.7140     | 0.1351 | 0.1135 |
|                          | 30  | (2*5, 0*10, 2*5)   | 0.6347     | 0.0766 | 0.0739 | 0.6414     | 0.1480 | 0.0960 |
|                          |     | (0*19, 20)         | 0.6711     | 0.0872 | 0.0655 | 0.6165     | 0.1029 | 0.0971 |
|                          |     | (1*10, 0*20)       | 0.7085     | 0.1682 | 0.0665 | 0.7280     | 0.1976 | 0.1543 |
|                          |     | (0*20, 1*10)       | 0.6252     | 0.1044 | 0.0623 | 0.6244     | 0.2197 | 0.1736 |
|                          |     | (2*5, 0*25)        | 0.6162     | 0.1387 | 0.0778 | 0.6112     | 0.1874 | 0.1298 |
|                          |     | (0*25, 2*5)        | 0.6792     | 0.0586 | 0.0536 | 0.5554     | 0.1682 | 0.1376 |
|                          |     | (0*13, 2*5, 0*12)  | 0.5877     | 0.0670 | 0.0605 | 0.6115     | 0.0990 | 0.0989 |
|                          |     | (0*10, 1*10, 0*10) | 0.6465     | 0.0686 | 0.0589 | 0.6934     | 0.0887 | 0.0683 |
|                          |     | (0*29, 10)         | 0.5642     | 0.0763 | 0.0561 | 0.5415     | 0.0763 | 0.0667 |
|                          |     | (0*40)             | 0.4915     | 0.0681 | 0.0510 | 0.4616     | 0.0753 | 0.0485 |
|                          | 40  | (1*40)             | 0.5052     | 0.1127 | 0.0861 | 0.5256     | 0.1618 | 0.1287 |
|                          |     | (2*20, 0*20)       | 0.5362     | 0.0596 | 0.0582 | 0.5389     | 0.1970 | 0.1302 |
|                          |     | (0*20, 2*20)       | 0.4247     | 0.0715 | 0.0543 | 0.4323     | 0.1493 | 0.1359 |
|                          |     | (0*16, 4*10, 0*14) | 0.4212     | 0.0497 | 0.0265 | 0.4218     | 0.1410 | 0.1188 |
|                          |     | (0*10, 2*20, 0*10) | 0.4800     | 0.0766 | 0.0466 | 0.5166     | 0.0672 | 0.0627 |
|                          |     | (2*10, 0*20, 2*10) | 0.4542     | 0.0607 | 0.0392 | 0.4616     | 0.1002 | 0.0921 |
|                          |     | (0*39, 40)         | 0.4200     | 0.0555 | 0.0411 | 0.4082     | 0.0591 | 0.0501 |
|                          |     | (1*20, 0*40)       | 0.5040     | 0.0611 | 0.0598 | 0.5178     | 0.1410 | 0.1108 |
|                          |     | (0*40, 1*20)       | 0.4401     | 0.0520 | 0.0393 | 0.4469     | 0.1900 | 0.1291 |
|                          |     | (2*10, 0*50)       | 0.4404     | 0.0439 | 0.0437 | 0.4292     | 0.1162 | 0.0996 |
|                          |     | (0*50, 2*10)       | 0.4881     | 0.0386 | 0.0346 | 0.3853     | 0.1280 | 0.1047 |
|                          |     | (0*26, 2*10, 0*24) | 0.4264     | 0.0539 | 0.0490 | 0.4365     | 0.0623 | 0.0522 |
|                          |     | (0*20, 1*20, 0*20) | 0.4653     | 0.0420 | 0.0348 | 0.4991     | 0.0815 | 0.0803 |
|                          |     | (0*59, 20)         | 0.4113     | 0.0302 | 0.0281 | 0.3982     | 0.0562 | 0.0439 |
|                          |     | (0*80)             | 0.4023     | 0.0264 | 0.0262 | 0.3958     | 0.0322 | 0.0269 |
