# Supplementary material
Source: MDPI journal article supplement (https://www.mdpi.com/2073-8994/14/11/2379)

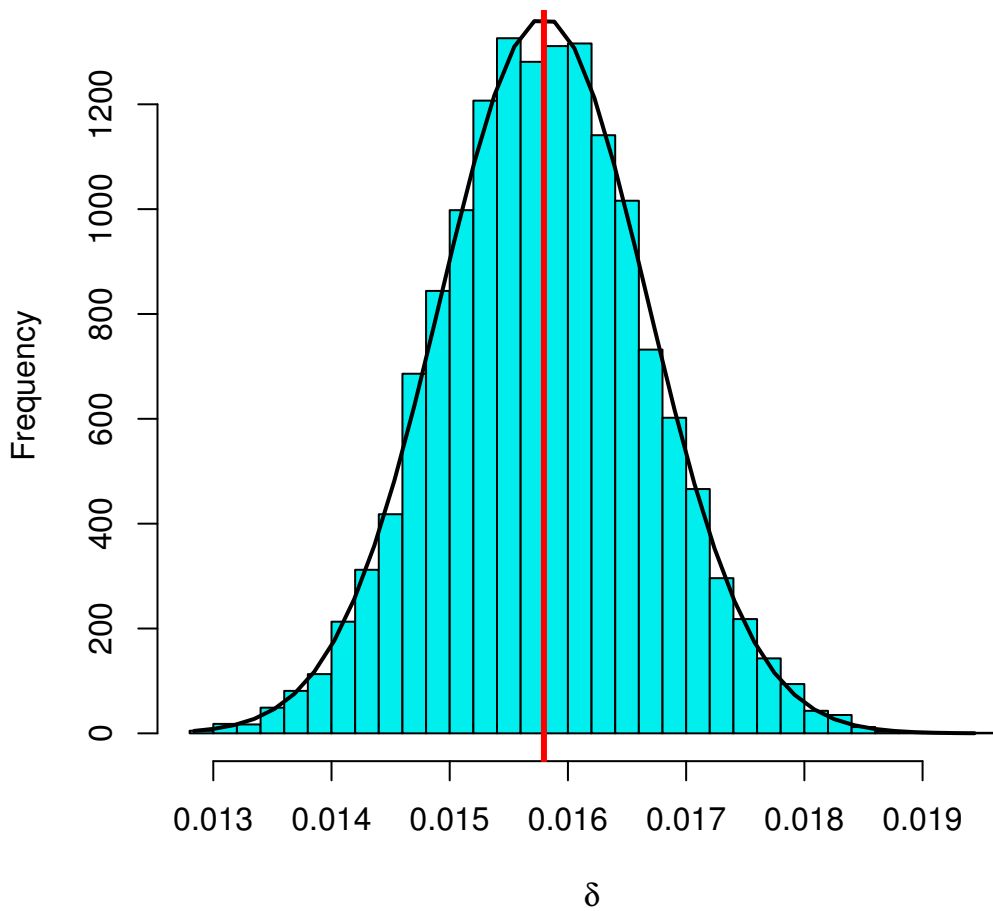

Supplement: s1 [file s1]

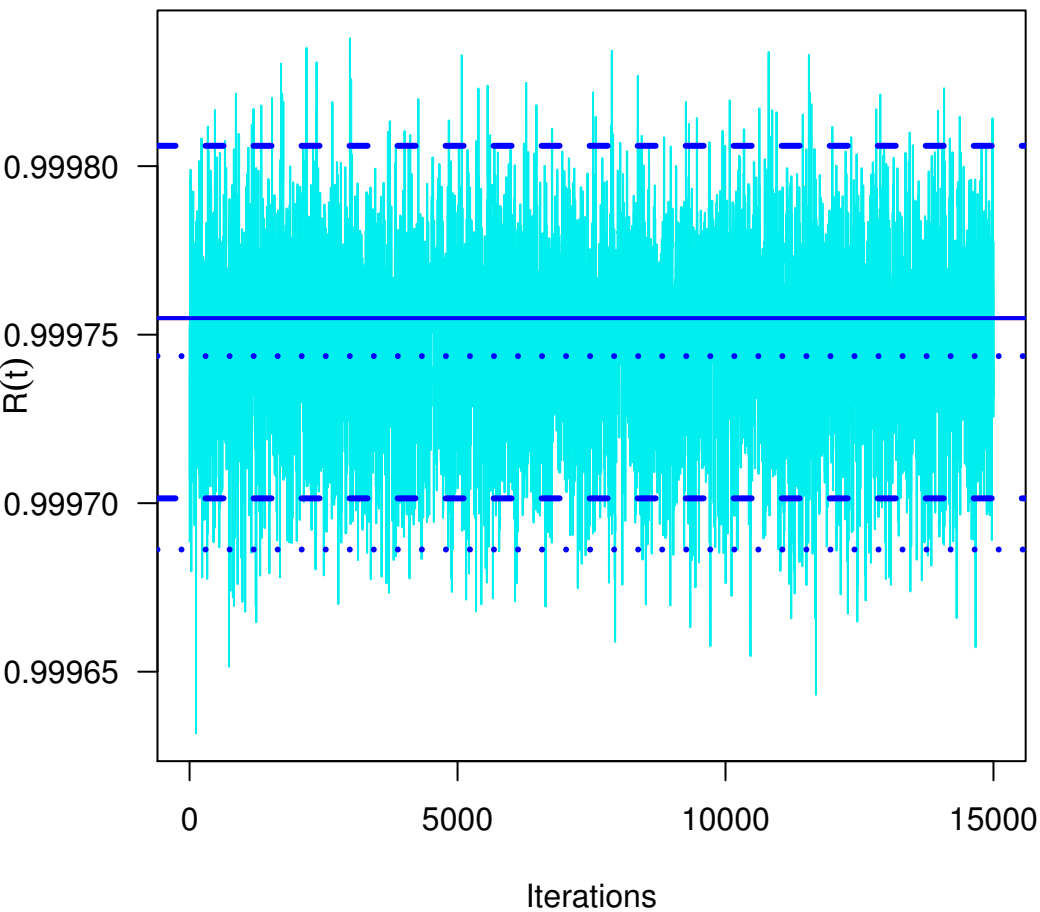

Supplement: s1 [file s1]

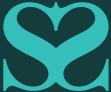

*symmetry*

Supplement: s1 [file s1]

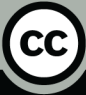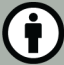

BY

Supplement: s1 [file s1]

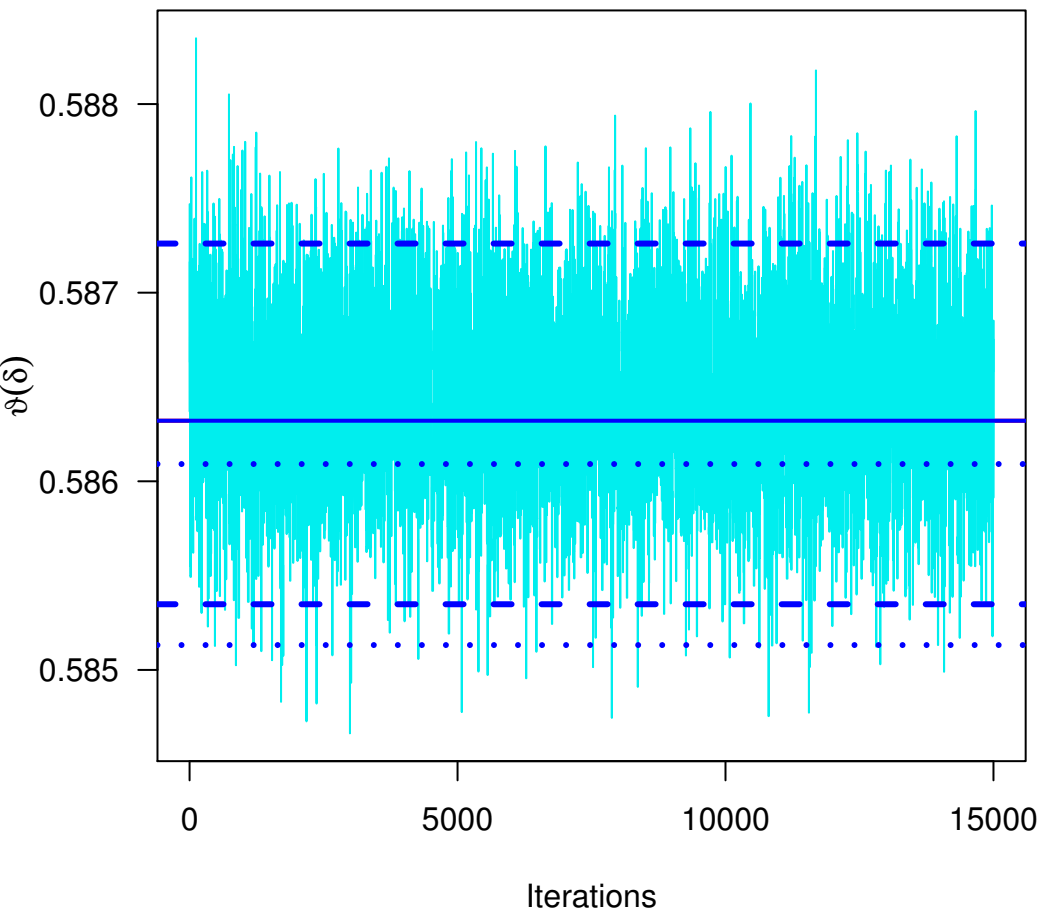

Supplement: s1 [file s1]

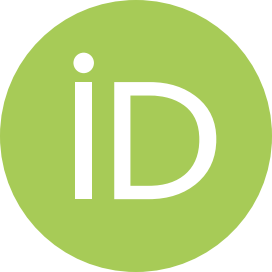

Supplement: s1 [file s1]

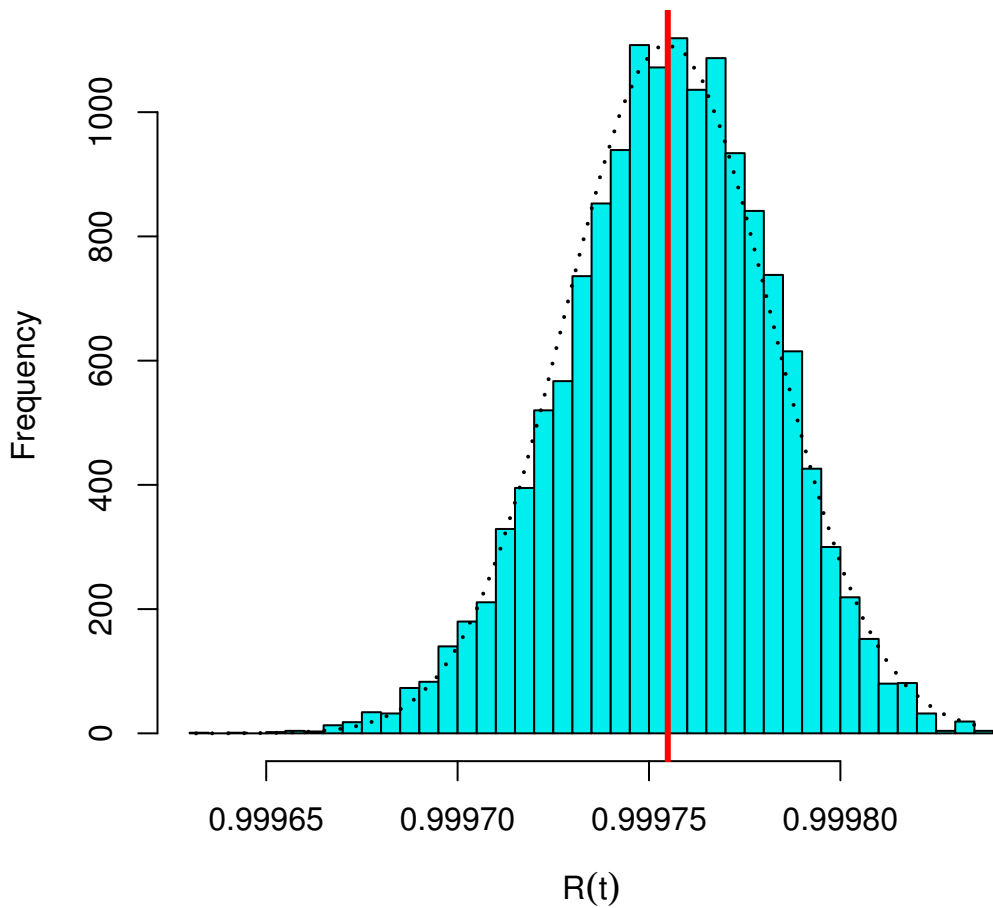

Supplement: s1 [file s1]

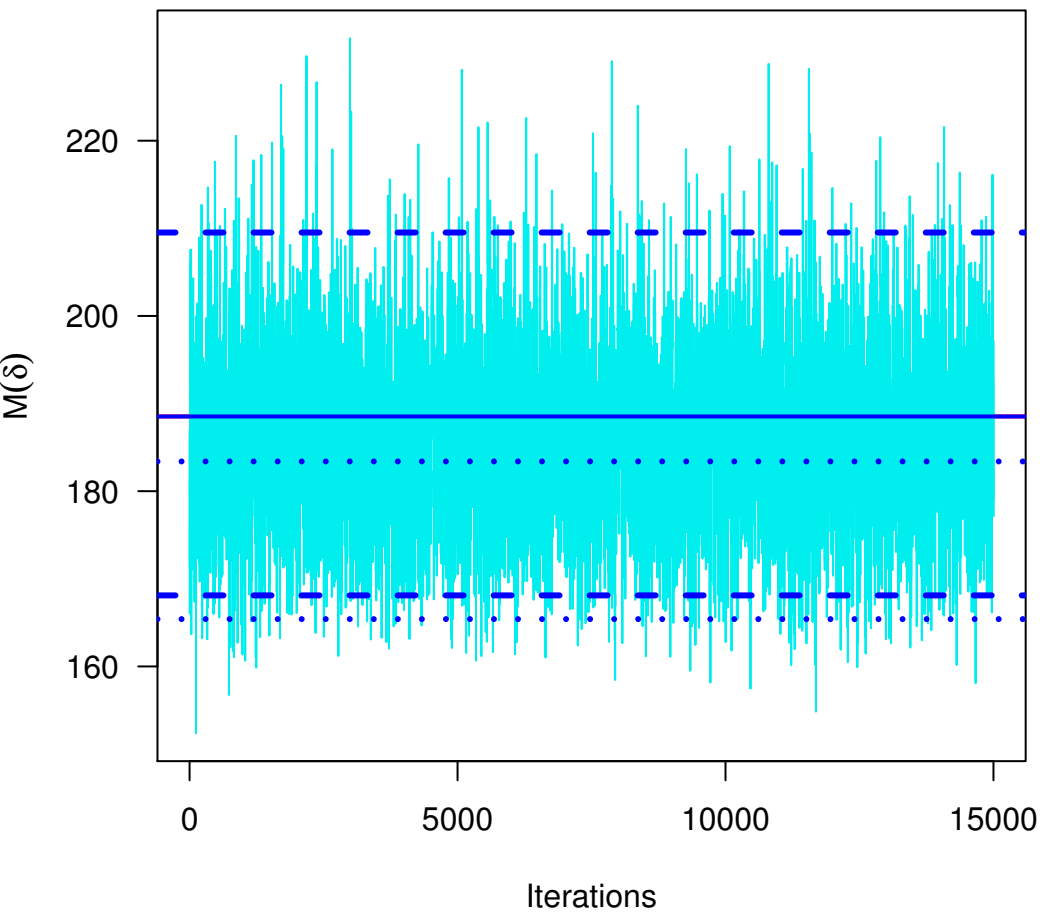

Supplement: s1 [file s1]

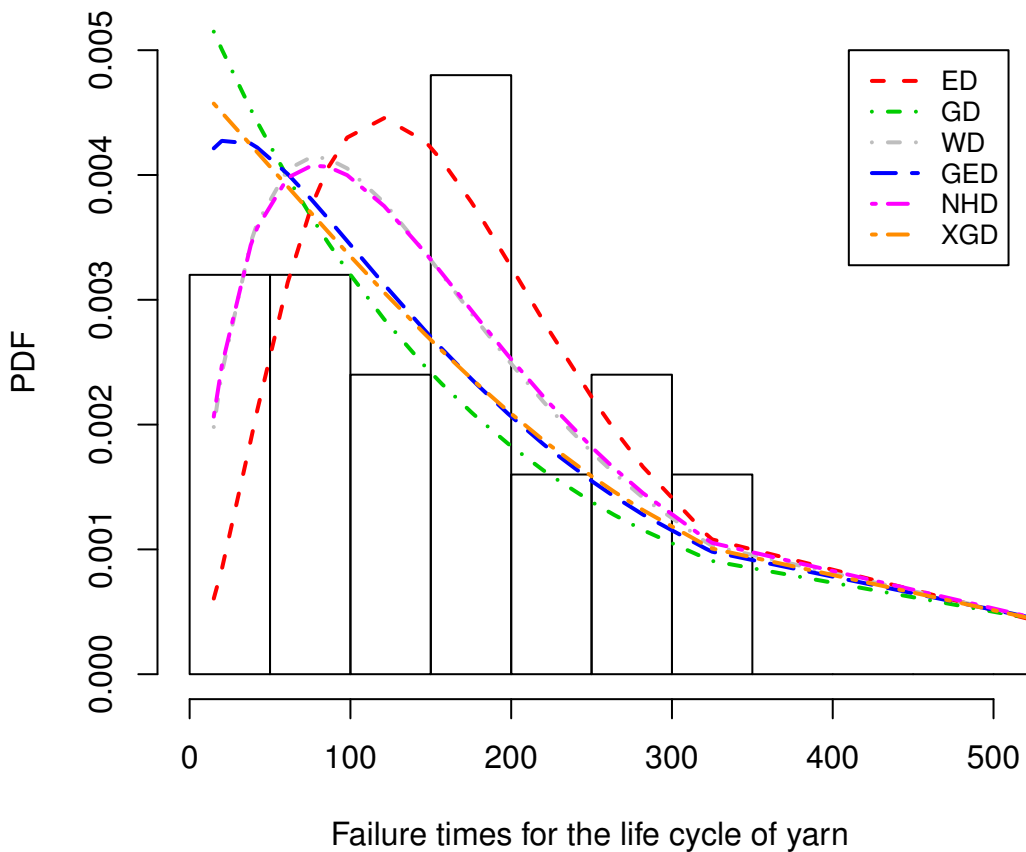

Supplement: s1 [file s1]

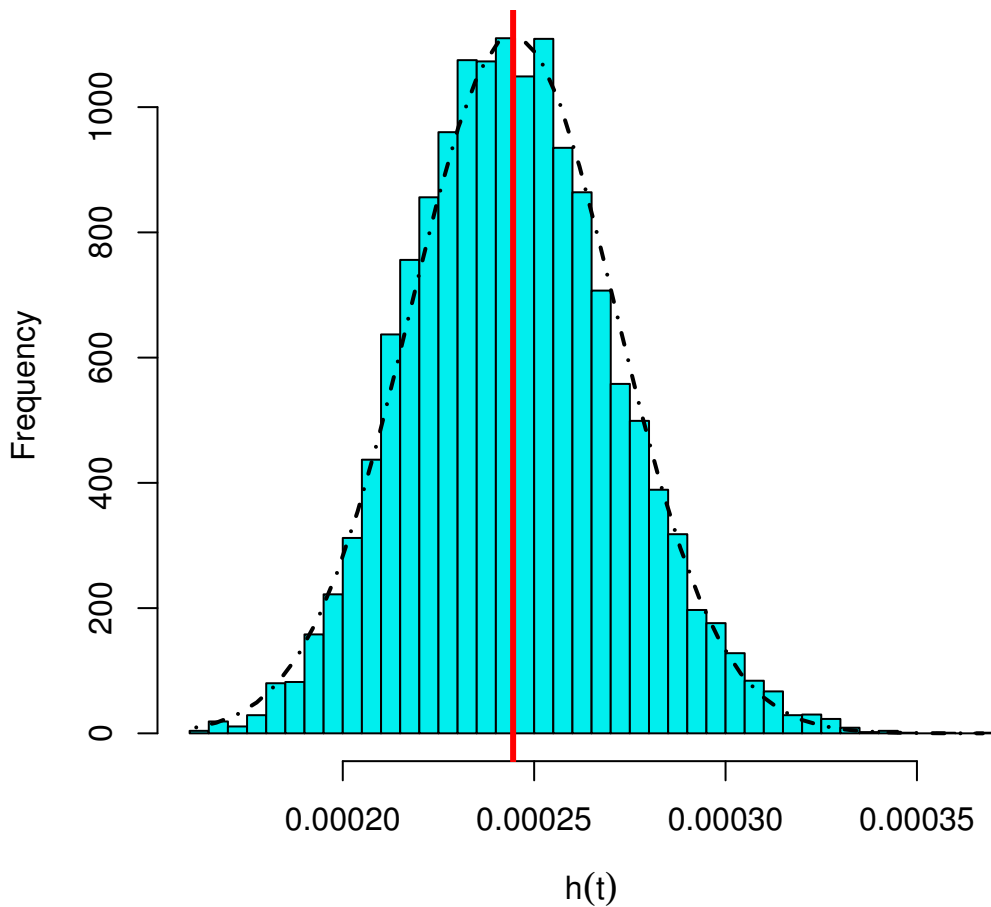

Supplement: s1 [file s1]

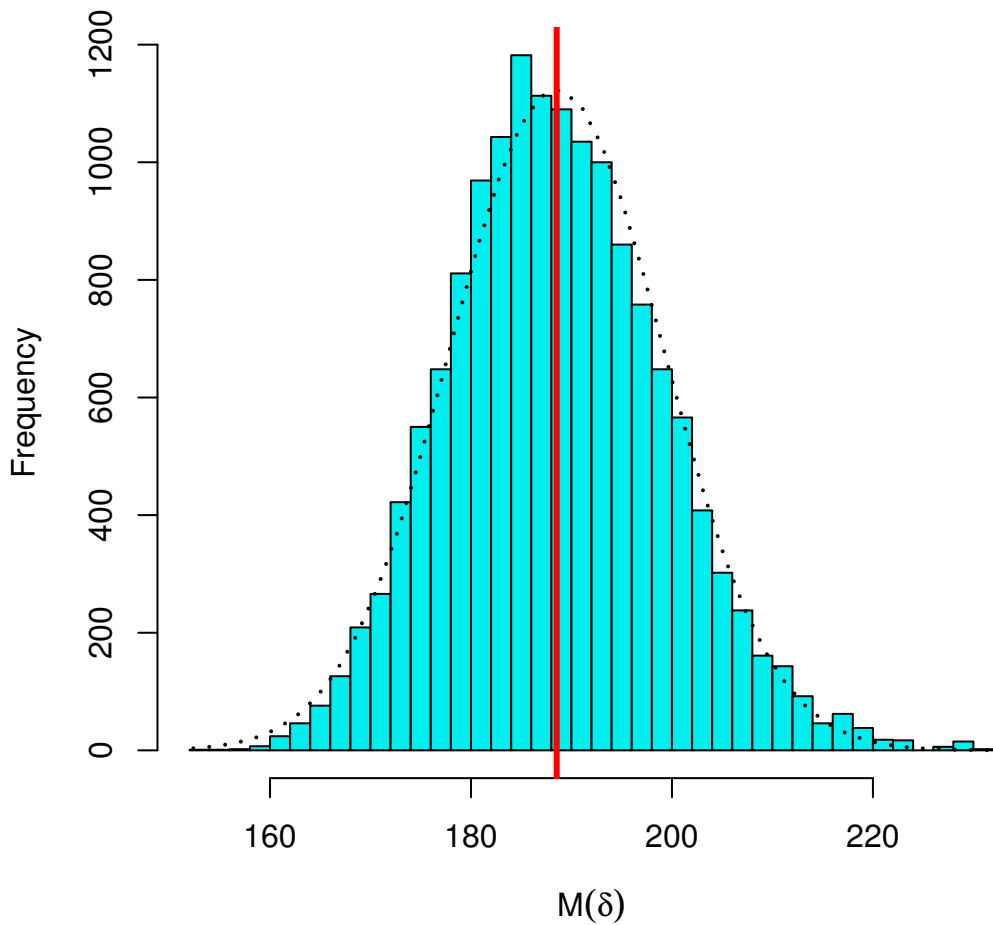

Supplement: s1 [file s1]

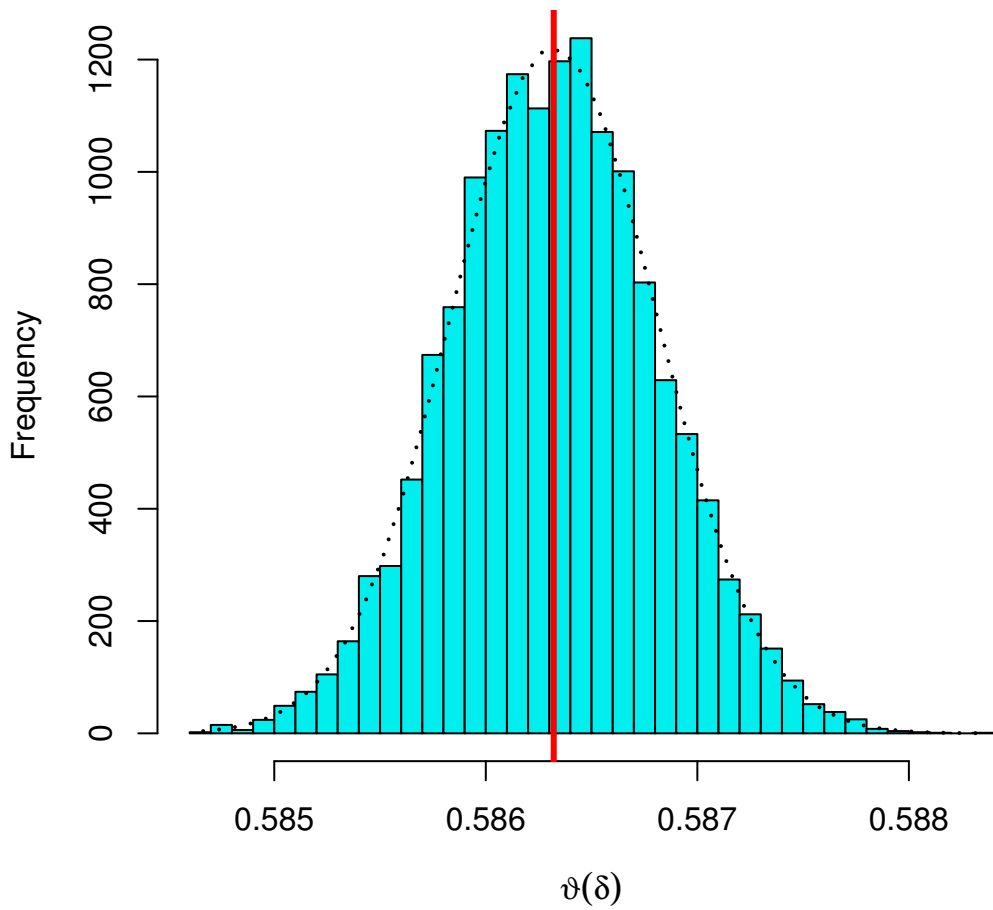

Supplement: s1 [file s1]

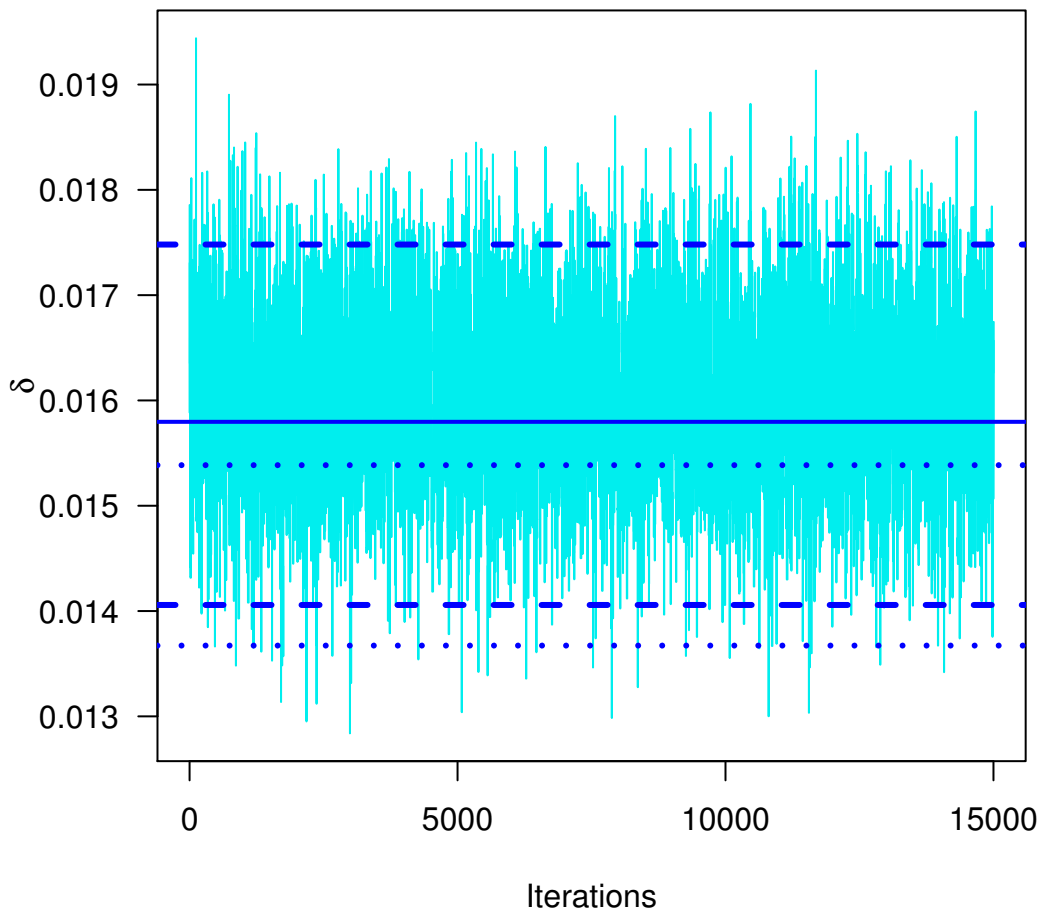

Supplement: s1 [file s1]

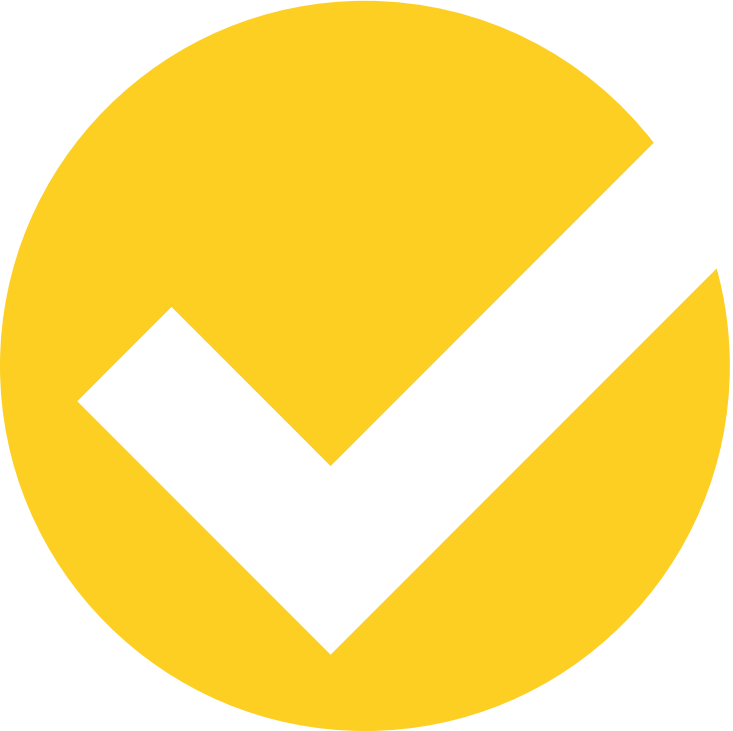

check for  
updates

Supplement: s1 [file s1]

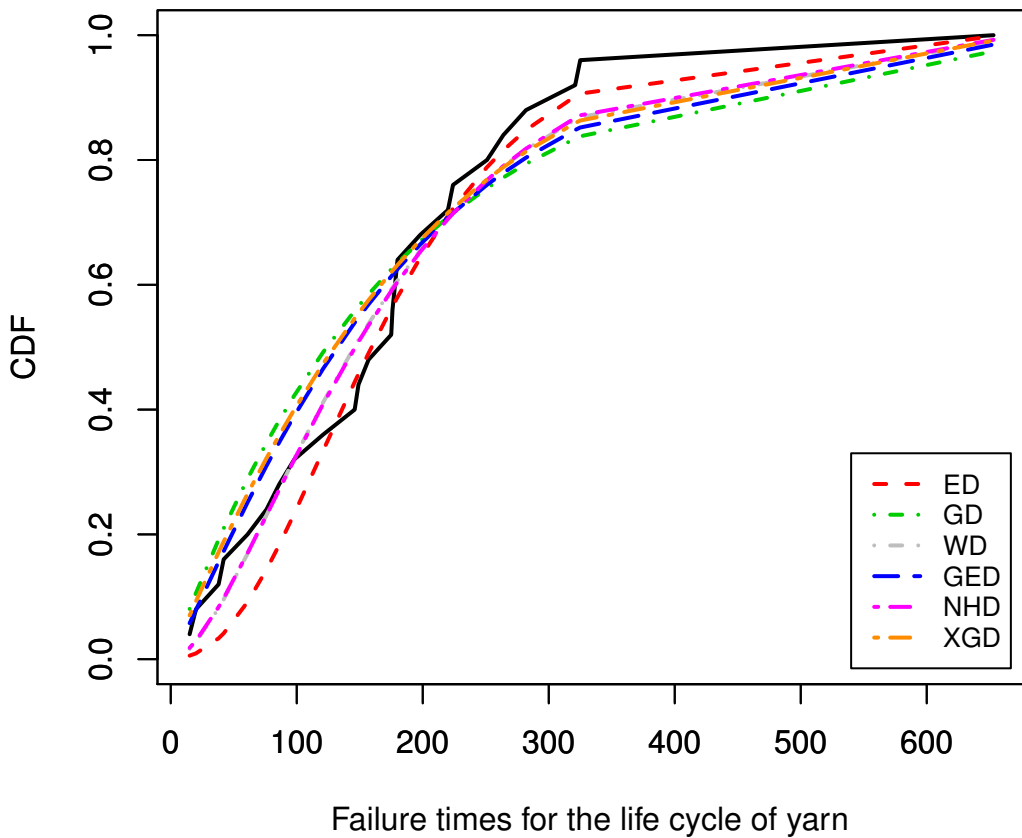

Supplement: s1 [file s1]

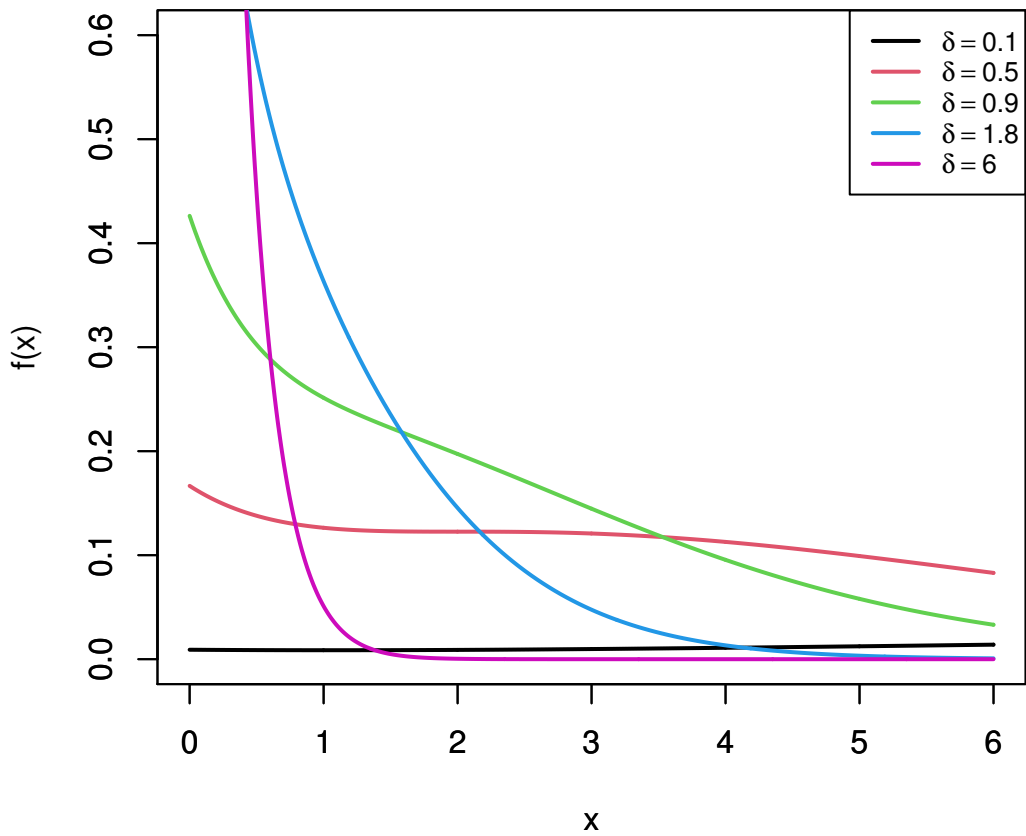

Supplement: s1 [file s1]

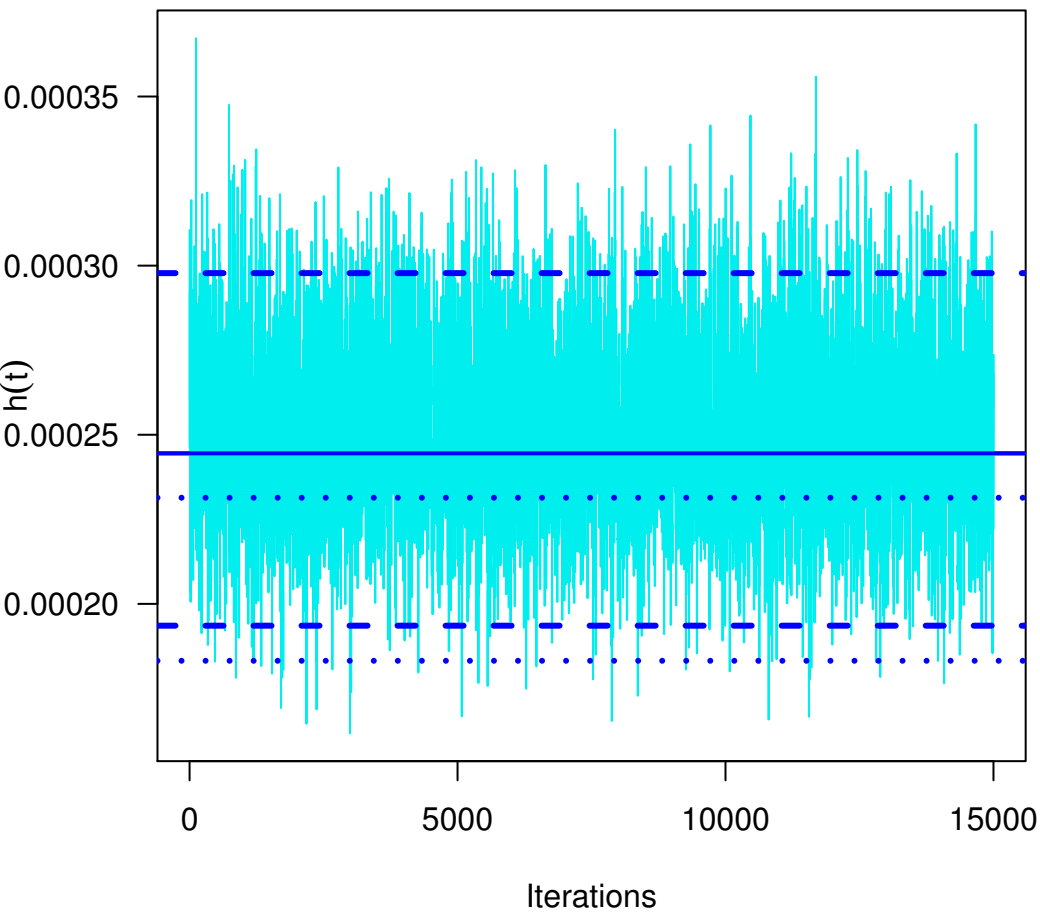

Supplement: s1 [file s1]

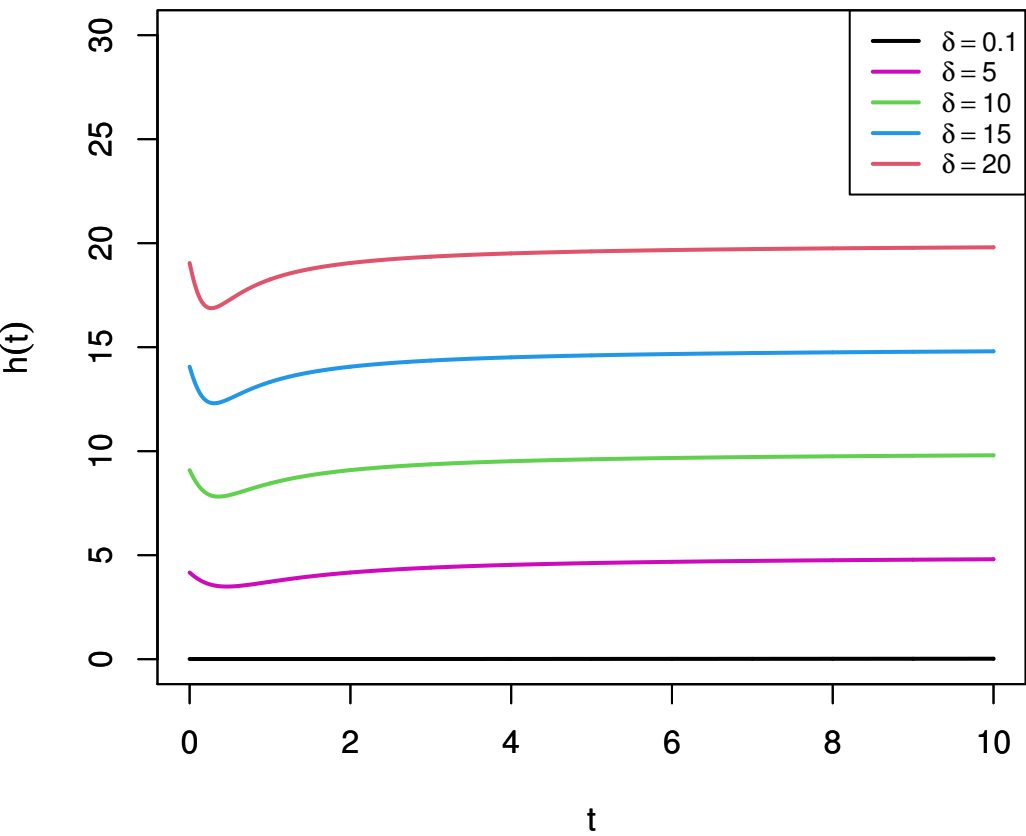

Supplement: s1 [file s1]
